# Supplementary material
Source: HighWire-hosted journal article supplement (https://ard.bmj.com/content/76/3/504)
Supplement: inline-supplementary-material-1 [file inline-supplementary-material-1.pdf]

Table S1: MedRA codes for diagnoses possibly related to perforations

| pt_code  | pt_term                                 |
|----------|-----------------------------------------|
| 1000099  | Abdominal wall abscess                  |
| 1000285  | Abscess intestinal                      |
| 1000582  | Acquired tracheo-oesophageal fistula    |
| 1002156  | Anal fistula                            |
| 1002157  | Anal fistula excision                   |
| 1002248  | Anastomotic ulcer perforation           |
| 1002924  | Aorto-duodenal fistula                  |
| 1003012  | Appendicitis perforated                 |
| 1000995  | Colonic fistula                         |
| 10013536 | Diverticular fistula                    |
| 10013538 | Diverticulitis                          |
| 10013541 | Diverticulitis intestinal haemorrhagic  |
| 10013828 | Duodenal fistula                        |
| 10013832 | Duodenal perforation                    |
| 10013849 | Duodenal ulcer perforation              |
| 10013850 | Duodenal ulcer perforation, obstructive |
| 10017815 | Gastric perforation                     |
| 10017835 | Gastric ulcer perforation               |
| 10017836 | Gastric ulcer perforation, obstructive  |
| 10017866 | Gastritis haemorrhagic                  |
| 10017877 | Gastrointestinal fistula                |
| 10017954 | Gastrointestinal gangrene               |
| 10017955 | Gastrointestinal haemorrhage            |
| 10018001 | Gastrointestinal perforation            |
| 10021305 | Ileal perforation                       |
| 10021310 | Ileal ulcer perforation                 |
| 10022647 | Intestinal fistula                      |
| 10022694 | Intestinal perforation                  |
| 10023174 | Jejunal perforation                     |
| 10023178 | Jejunal ulcer perforation               |
| 10023804 | Large intestine perforation             |
| 10030181 | Oesophageal perforation                 |
| 10034354 | Peptic ulcer perforation                |
| 10034358 | Peptic ulcer perforation, obstructive   |
| 10034397 | Perforated peptic ulcer oversewing      |
| 10034649 | Peritoneal abscess                      |
| 10034674 | Peritonitis                             |
| 10038073 | Rectal perforation                      |
| 10038975 | Retroperitoneal abscess                 |
| 10041103 | Small intestinal perforation            |
| 10046274 | Upper gastrointestinal haemorrhage      |
| 10048946 | Anal abscess                            |
| 10048947 | Rectal abscess                          |
| 10049583 | Douglas' abscess                        |
| 10049764 | Appendiceal abscess                     |
| 10050362 | Anovulvar fistula                       |
| 10050953 | Lower gastrointestinal haemorrhage      |
| 10051425 | Enterocutaneous fistula                 |

|          |                                    |
|----------|------------------------------------|
| 10052211 | Oesophageal rupture                |
| 10052457 | Perineal abscess                   |
| 10052488 | Oesophageal ulcer perforation      |
| 10052814 | Perirectal abscess                 |
| 10052931 | Colon fistula repair               |
| 10052991 | Intestinal fistula repair          |
| 10053267 | Rectal fistula repair              |
| 10056086 | Paraoesophageal abscess            |
| 10056346 | Anastomotic haemorrhage            |
| 10056991 | Enterocolonic fistula              |
| 10056992 | Oesophagobronchial fistula         |
| 10058381 | Oesophageal fistula repair         |
| 10059175 | Intestinal haemorrhage             |
| 10060921 | Abdominal abscess                  |
| 10061248 | Intestinal ulcer perforation       |
| 10061249 | Intra-abdominal haemorrhage        |
| 10061820 | Diverticular perforation           |
| 10061975 | Gastrointestinal ulcer perforation |
| 10062065 | Perforated ulcer                   |
| 10062070 | Peritonitis bacterial              |
| 10062570 | Enterovesical fistula              |
| 10065713 | Gastric fistula                    |
| 10065879 | Gastrointestinal anastomotic leak  |
| 10066870 | Aorto-oesophageal fistula          |
| 10066892 | Rectourethral fistula              |
| 10067091 | Gastropleural fistula              |
| 10068792 | Gastrosplenic fistula              |
| 10073573 | Colonic abscess                    |

Table S2: Demographics, comedication and clinical presentation of patients with LIP under TCZ

| Case No. | Event                                                                                                                                                                                                | Date of LIP event      | TCZ treatment course                                                                                                         | CRP values           | Days between death and LIP and cause of death (COD) | Age at LIP            | Clinical presentation                                                                  |
|----------|------------------------------------------------------------------------------------------------------------------------------------------------------------------------------------------------------|------------------------|------------------------------------------------------------------------------------------------------------------------------|----------------------|-----------------------------------------------------|-----------------------|----------------------------------------------------------------------------------------|
| 1        | a) Admission to hospital due to suspected vesico-sigmoidal fistula<br>- elective surgery beginning of december 2010<br><br>b) during hospital stay:<br>diverticulum perforation of colon transversum | 11/2010<br><br>12/2010 | TCZ<br>03/2009-08/2009;<br><br>restart and<br>LI 09/2010 TOC<br>(one infusion)<br><br><i>GC 25mg/d</i>                       | <b>51.8 mg/l</b>     | ‡ 2 days<br>after LIP (b);<br>COD: sepsis           | >65-70 yrs,<br>female | b) Cardiac<br>arrhythmia,<br>acute<br>abdomen                                          |
| 2        | Sigmoidal diverticulitis with abscess,<br>Hansen/Stock State IIb                                                                                                                                     | 6/2014                 | TCZ since 11/2013<br><br>LI 06/2014<br><br><i>GC 5mg/d</i>                                                                   | <b>53 mg/l</b>       | -                                                   | >60-65 yrs,<br>Male   | Clinical<br>suspicion of<br>sigma<br>diverticulitis                                    |
| 3        | Colonic perforation (Colon ascendens)                                                                                                                                                                | 05/2012                | TCZ since 08/2009;<br><br>LI at 04/2012<br><br><i>No regular GC;<br/>last GC application<br/>(once) in November<br/>2011</i> | <b>Not<br/>known</b> | -                                                   | >75-80 yrs,<br>male   | No<br>information<br>about<br>symptoms<br>achievable<br>due to<br>comorbid<br>dementia |
| 4        | Covered diverticular perforation of the sigma<br><br>Comorbidity: Diverticulitis 31.3.-4.4.2013 (TCZ)                                                                                                | 04/2014                | TCZ<br>04/12-12/12; 03/13-<br>10/13;<br>Restart 01/14                                                                        | <b>&lt; 1 mg/l</b>   | -                                                   | >55-60 yrs,<br>female | Abdominal<br>pain since two<br>days, slight<br>nausea and                              |

|   |                                                                                                                                         |         |                                                                                  |                  |                                                                   |                    |                                                                                     |
|---|-----------------------------------------------------------------------------------------------------------------------------------------|---------|----------------------------------------------------------------------------------|------------------|-------------------------------------------------------------------|--------------------|-------------------------------------------------------------------------------------|
|   | Chronic diverticulosis since 2007                                                                                                       |         | LI 03/2014<br><i>GC 7,5 mg/d</i>                                                 |                  |                                                                   |                    | vomiting, no appetite. Soft abdomen, no muscular defense of abdomen                 |
| 5 | Diagnose from death certificate:<br>Perforation of the sigma with subsequent peritonitis of all 4 quadrants<br><br>Subsequent pneumonia | 06/2013 | TOC since 03/2013<br><i>GC 15 mg/d</i>                                           | <b>n.a.</b>      | † 14 days after LIP;<br>COD: pneumonia                            | >75-80 yrs, female | -                                                                                   |
| 6 | Perforation of the sigma with massive purulent peritonitis of all 4 quadrants                                                           | 04/2014 | TOC since 08/2009;<br>LI 4/2014;<br><i>GC 5 mg/d</i>                             | <b>19.6 mg/l</b> | -                                                                 | >60-65 yrs, female | Diffuse abdominal pain since one week, soft abdomen, no muscular defense of abdomen |
| 7 | Ischaemic perforation of colon transversum with peritonitis                                                                             | 01/2012 | TOC since 08/2011;<br>LI 12/2011<br><i>GC since 09/2011 increased to 18 mg/d</i> | <b>30.5 mg/l</b> | † 12 days after LIP;<br>COD: septic shock with multiorgan failure | >70-75 yrs, female | Sudden severe abdominal pain                                                        |
| 8 | Transmural perforation of the sigma                                                                                                     | 05/2009 | TOC since 03/2009;<br>LI 04/2009 (2nd TCZ infusion)<br><i>GC 15 mg/d</i>         | <b>72.3 mg/l</b> | -                                                                 | >70-75 yrs, female | Slight abdominal pain since several days; sigma perforation was detected with       |

|    |                                                                                                                                                                                                                                                            |                                    |                                                                                                                                                                   |                                                                                                                                     |                                              |                    |                                                                                                                            |
|----|------------------------------------------------------------------------------------------------------------------------------------------------------------------------------------------------------------------------------------------------------------|------------------------------------|-------------------------------------------------------------------------------------------------------------------------------------------------------------------|-------------------------------------------------------------------------------------------------------------------------------------|----------------------------------------------|--------------------|----------------------------------------------------------------------------------------------------------------------------|
|    |                                                                                                                                                                                                                                                            |                                    |                                                                                                                                                                   |                                                                                                                                     |                                              |                    | sonography at routine rheumatologic visit                                                                                  |
| 9  | Perforation of the sigma with peritonitis of all 4 quadrants (only during examination in pathology the diverticulitis was found)<br><br>Incidental finding in pathology: rectal adenocarcinoma (pT3b, N0 (0/21), L0, V0, R0) – not causing the perforation | 04/2014                            | TOC since 04/2012;<br><br>LI 04/2014;<br><br><i>GC 5 mg/d</i>                                                                                                     | <b>20 mg/l</b>                                                                                                                      | ‡ 3 days after LIP; septic shock             | >65-70 yrs, female | Acute abdominal pain                                                                                                       |
| 10 | Perforation of the sigma                                                                                                                                                                                                                                   | Diagnosed 11/2014                  | TCZ 02/2012-04/2012 withdrawn because of continuing diarrhoea<br><br>Restart in 12/2012<br><br>LI 09/2014;<br><br><i>No GC (withdrawn since 03/2013 (5 mg/d))</i> | <b>11.3 mg/l</b> , at admission to hospital (27.10.14) increasing to <b>324.9 mg/l</b> (4.11.) at transfer to the ICU due to sepsis | ‡ 3 months after LIP; COD: cardiac failure   | >60-65 yrs, female | Presentation in the clinic with severe back pain (--> trauma surgery); after two days development of severe abdominal pain |
|    | multiple revision surgery                                                                                                                                                                                                                                  | Hospital until 02/2015             |                                                                                                                                                                   |                                                                                                                                     |                                              |                    |                                                                                                                            |
|    | geriatric rehabilitation                                                                                                                                                                                                                                   | Geriatric rehabilitation in 2/2015 |                                                                                                                                                                   |                                                                                                                                     |                                              |                    |                                                                                                                            |
| 11 | Colonic perforation with acute peritonitis                                                                                                                                                                                                                 | 10/2009                            | TOC since 05/2009;<br><br>LI 10/2009;<br><br><i>GC 5 mg/d</i>                                                                                                     | <b>227.9 mg/l</b>                                                                                                                   | ‡ 12 days after LIP; COD: escherichia sepsis | >75-80 yrs, female | Abdominal pain since 4 days                                                                                                |

LI: last infusion; COD: cause of death; although we have exact dates for age and treatment starts/stops/infusions, we do not show them due to data protection rules

Table S3: Sensitivity analysis with bDMARD naive Control patients.

|                                      | Multiple<br>Cox-Regression 1 |              | Multiple<br>Cox-Regression 2 |              |
|--------------------------------------|------------------------------|--------------|------------------------------|--------------|
|                                      | HR                           | 95% CI       | HR                           | 95% CI       |
| <b>Age at Event (by 5 years)</b>     | 1.65                         | [1.36; 1.99] | 1.67                         | [1.37; 2.02] |
| <b>Sex, males</b>                    | 1.62                         | [0.78; 3.39] | 1.44                         | [0.69; 2.99] |
| <b>DMARD (reference: csDMARDs)</b>   |                              |              |                              |              |
| <b>TNFi</b>                          | 1.15                         | [0.51; 2.60] | 1.18                         | [0.52; 2.65] |
| <b>Other bDMARDs</b>                 | 0.50                         | [0.11; 2.24] | 0.38                         | [0.09; 1.68] |
| <b>Tocilizumab</b>                   | 5.05                         | [2.15; 11.9] | 4.34                         | [1.83; 10.3] |
| <b>Glucocorticoids</b>               |                              |              |                              |              |
| <b>Current GC (by 5mg)</b>           | 1.28                         | [1.19; 1.39] |                              |              |
| <b>Cumulative GC use<sup>†</sup></b> |                              |              | 2.01                         | [1.60; 2.52] |
| <b>NSAIDs</b>                        |                              |              |                              |              |
| <b>Current NSAID</b>                 | 2.22                         | [1.09; 4.51] |                              |              |
| <b>Cumulative NSAIDs<sup>‡</sup></b> |                              |              | 2.64                         | [1.12; 6.21] |

In this sensitivity analysis (a) only bDMARD naive patients were included in the reference group of csDMARD patients. Compared to the full analysis this strategy reduced the total number of LIPs to n=32, due to switching treatments.

Table S4. Incidence of lower intestinal perforation (LIP) by calendar year.

|                    | 2004     | 2005     | 2006     | 2007     | 2008     | 2009     | 2010     | 2012     | 2013     | 2014     | 2015     |           |
|--------------------|----------|----------|----------|----------|----------|----------|----------|----------|----------|----------|----------|-----------|
| <b>csDMARDs</b>    | 0        | 1        | 1        | 1        | 3        | 1        | 1        | 0        | 1        | 2        | 0        | <b>11</b> |
| <b>TNFi</b>        | 2        | 3        | 0        | 3        | 0        | 1        | 1        | 0        | 1        | 2        | 0        | <b>13</b> |
| <b>Tocilizumab</b> | 0        | 0        | 0        | 0        | 0        | 2        | 1        | 2        | 1        | 5        | 0        | <b>11</b> |
| <b>Abatacept</b>   | 0        | 0        | 0        | 0        | 0        | 1        | 0        | 0        | 0        | 0        | 0        | <b>1</b>  |
| <b>Rituximab</b>   | 0        | 0        | 0        | 0        | 0        | 0        | 0        | 1        | 0        | 0        | 0        | <b>1</b>  |
|                    | <b>1</b> | <b>4</b> | <b>1</b> | <b>4</b> | <b>3</b> | <b>5</b> | <b>3</b> | <b>3</b> | <b>3</b> | <b>9</b> | <b>0</b> | <b>37</b> |

Table S5. Incidence of diverticulitis without perforation by calendar year.

|                    | 2004     | 2005     | 2006     | 2007     | 2008     | 2009     | 2010     | 2012     | 2013     | 2014      | 2015     |           |
|--------------------|----------|----------|----------|----------|----------|----------|----------|----------|----------|-----------|----------|-----------|
| <b>csDMARDs</b>    | 3        | 0        | 0        | 0        | 2        | 4        | 1        | 3        | 4        | 4         | 2        | <b>23</b> |
| <b>TNFi</b>        | 2        | 1        | 1        | 1        | 4        | 1        | 2        | 3        | 2        | 5         | 2        | <b>24</b> |
| <b>Tocilizumab</b> | 0        | 0        | 0        | 0        | 0        | 1        | 0        | 0        | 1        | 2         | 1        | <b>5</b>  |
| <b>Abatacept</b>   | 0        | 0        | 0        | 0        | 0        | 0        | 0        | 0        | 0        | 0         | 0        | <b>0</b>  |
| <b>Rituximab</b>   | 0        | 0        | 0        | 0        | 0        | 0        | 0        | 1        | 0        | 2         | 0        | <b>3</b>  |
|                    | <b>5</b> | <b>1</b> | <b>1</b> | <b>1</b> | <b>6</b> | <b>6</b> | <b>3</b> | <b>7</b> | <b>7</b> | <b>13</b> | <b>5</b> | <b>55</b> |

Figure S1: Incidence rates of lower intestinal perforations (LIP) for csDMARDs and each biologic. The top panel depicts numbers based on all patients enrolled in RABBIT, the lower panel only patients enrolled after 2009 (sensitivity analysis (b)).

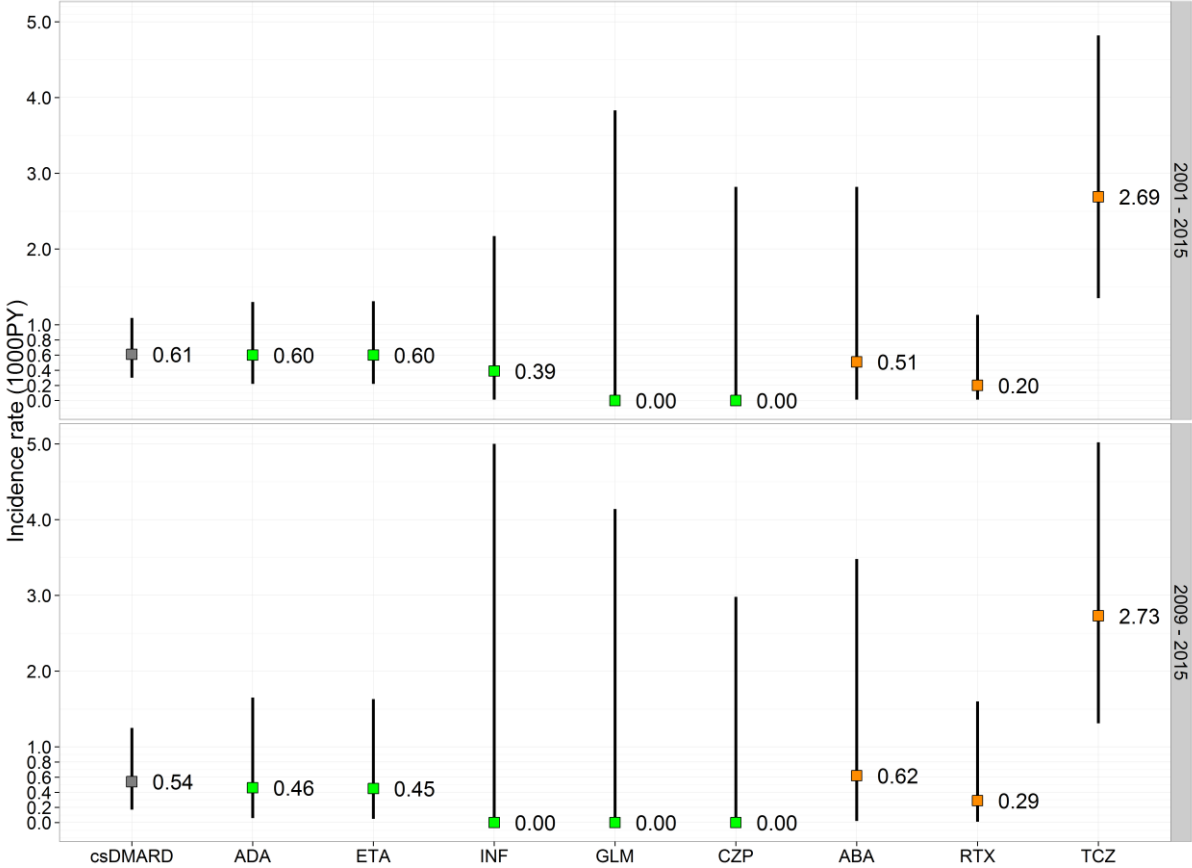

Incidence rates and 95% confidence intervals of lower intestinal perforation. Events and Patients years in the top panel: csDMARDs=11/18,113; ADA=6/10,027; ETA=6/9,982; INF=1/2,570; GLM=0/963; CZP=0/1,309; ABA=1/1976; RTX=1/4,950; TCZ=11/4,082. Events and Patients years in the lower panel: csDMARDs=5/9,322; ADA=2/4,379; ETA=2/4,426; INF=0/738; GLM=0/892; CZP=0/1,238; ABA=1/1,602; RTX=1/3,480; TCZ=10/3,660.
